# Supplementary material for: A PP2A-mediated feedback mechanism controls Ca2+-dependent NO synthesis under physiological oxygen
Source: FASEB J. 2017 Jul 31;31(12):5172–83. doi: 10.1096/fj.201700211R (PMC5690389; doi:10.1096/fj.201700211R)
Supplement: Supplemental Data [file supp_fj.201700211R_Supplemental_Figures.pdf]

## Supplemental Data Unit 1

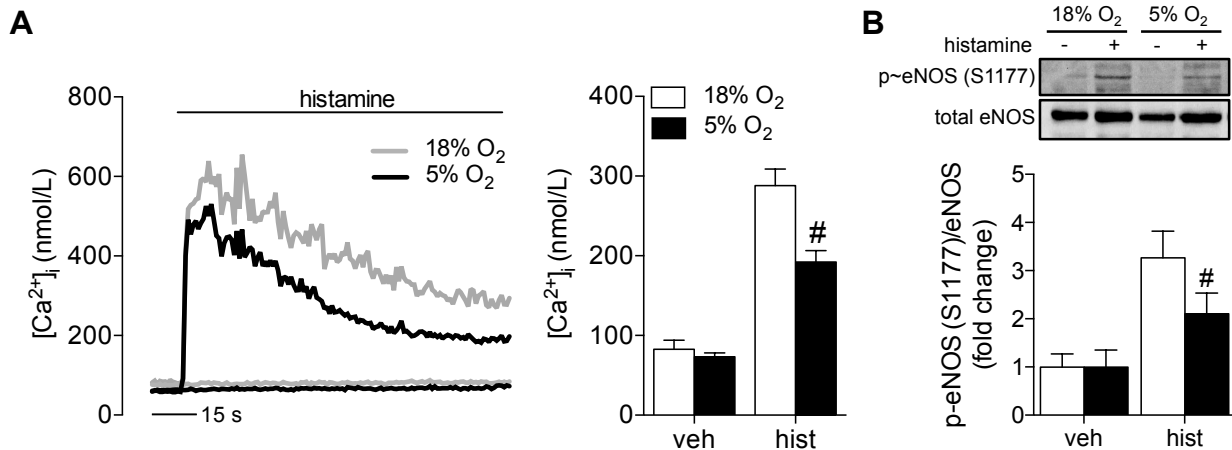

**Figure S1. Effects of physiological O<sub>2</sub> levels on Ca<sup>2+</sup> mobilization and eNOS phosphorylation in human coronary artery endothelial cells.**

HCAEC were cultured under standard (18%) or physiological (5%) O<sub>2</sub> levels for at least 5 days. **(A)** Basal and histamine stimulated intracellular Ca<sup>2+</sup> levels, shown as representative traces and the mean plateau values (115-120 s). **(B)** Histamine stimulated (10 μmol/L, 2 min) eNOS-S1177 phosphorylation expressed relative to total eNOS and loading control β-actin (not shown). Data denote mean ± S.E.M., n=4-5 different cultures, \*\*P<0.01, \*\*\*P<0.001 vs vehicle, #P<0.05 vs 18% O<sub>2</sub>. Treatment with histamine was significant vs control (P<0.05) under both 18% and 5% O<sub>2</sub>.

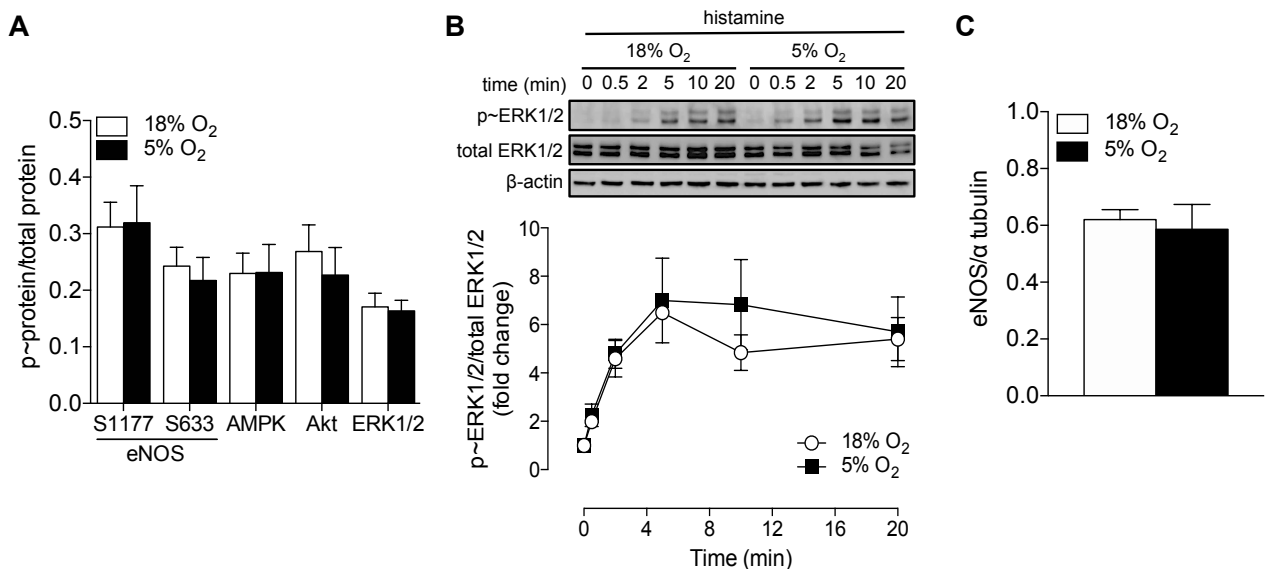

**Figure S2. Effects of O<sub>2</sub> on basal expression of eNOS, p-eNOS, p-AMPK, p-Akt and p-ERK1/2 and histamine-stimulated ERK1/2 phosphorylation in HUVEC.**

Cells were cultured under standard (18%) or physiological (5%) O<sub>2</sub> levels for at least 5 days. **(A)** Basal p-eNOS (Ser1177 and Ser633), p-AMPK p-Akt and p-ERK1/2 phosphorylation relative to respective total kinase protein levels and loading control β-actin (not shown). **(B)** HUVEC were stimulated with histamine (10 μmol/L) for 0-20 min and cell lysates immunoblotted for p-ERK1/2 relative to total ERK1/2 and loading control β-actin. **C**, eNOS expression in cells cultured under 18% or 5% O<sub>2</sub>. Data denote mean ± S.E.M., n=5 different donors.

## Supplemental Data Unit 2

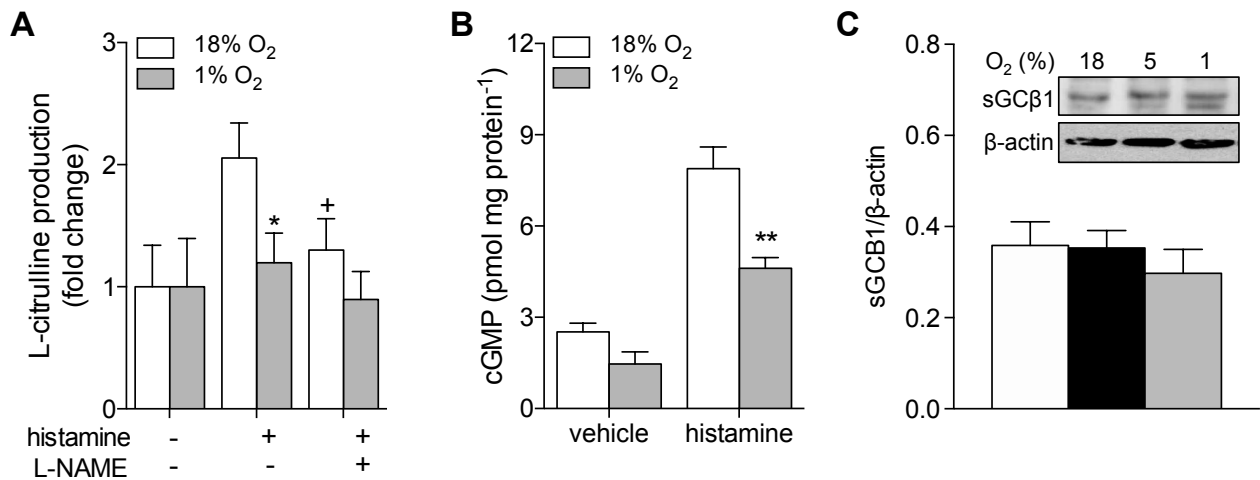

**Figure S3. eNOS activity and generation of cGMP in HUVEC under 1% O<sub>2</sub>.**

HUVEC were cultured under standard (18%) or hypoxic (1%) O<sub>2</sub> levels for at least 5 days. **(A)** Histamine (10 μmol/L, 5 min) stimulated conversion of L-[<sup>3</sup>H]arginine to L-[<sup>3</sup>H]citrulline (L-NAME-inhibitable, 100 μmol/L) as a measurement of eNOS activity, **(B)** Histamine stimulated cGMP generation, and **C**, soluble guanylate cyclase β1 subunit expression in cells cultured under 18, 5 and 1% O<sub>2</sub>. Data represent mean ± S.E.M. from 3-6 different donors. \*P<0.05, \*\*P<0.01 vs 18% O<sub>2</sub>, +P<0.05 vs histamine alone. Treatment with histamine was significant (P<0.05) vs respective control in both panels A and B at 18% O<sub>2</sub>, and only in panel B at 1% O<sub>2</sub>.

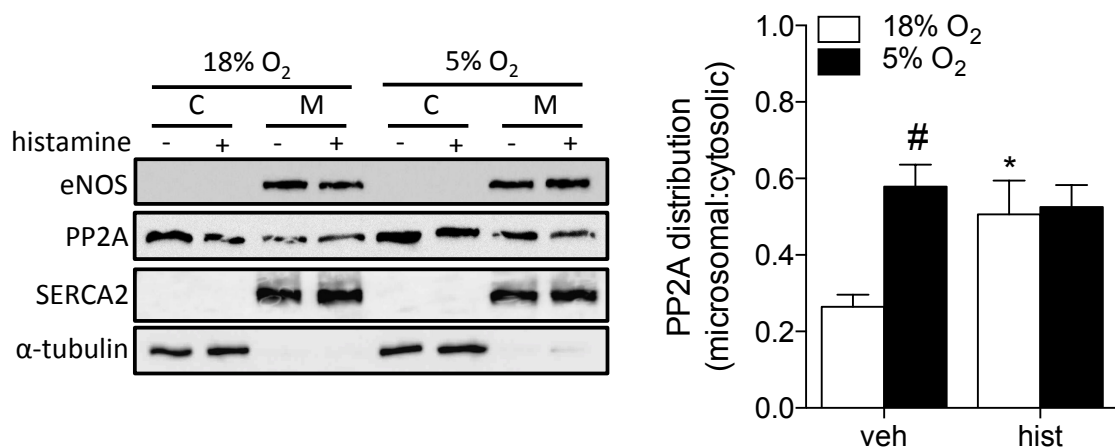

**Figure S4. PP2A expression in cytosolic and microsomal fractions following histamine stimulation under physiological O<sub>2</sub> levels.**

HUVEC were cultured under standard (18%) or physiological (5%) O<sub>2</sub> levels for at least 5 days and then stimulated with histamine (10 μmol/L, 5 min). **(A)** Lysates were separated into cytosolic (C) and microsomal (M) fractions by ultracentrifugation and presence of PP2A-A and eNOS assessed by immunoblot analysis **(B)**. Purity of the microsomal fraction was confirmed by absence of α-tubulin and presence of both SERCA2 and caveolin-1 (data not shown). **(B)** Quantification of PP2A microsomal distribution relative to cytosolic. Data denote the mean ± S.E.M. from 5 different donors. \*P<0.05 vs veh, #P<0.05 vs 18% O<sub>2</sub>.

Supplemental Data Unit 3

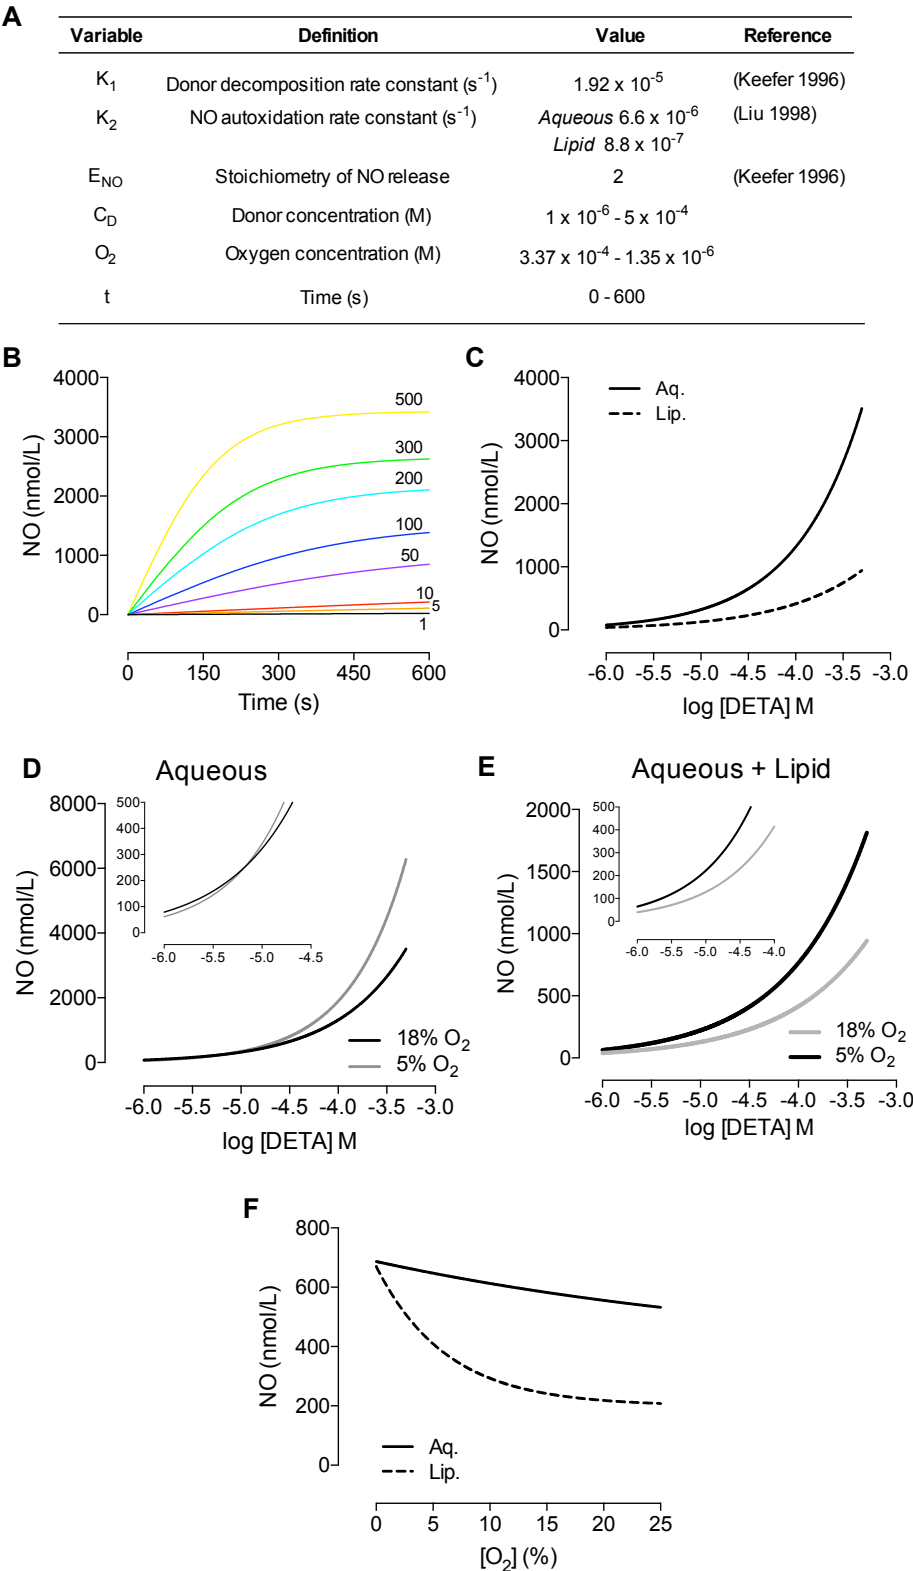

**Figure S5. Modeling of NO concentrations generated from DETA NONOate decomposition.** (A) Parameters used to simulate NO concentrations and description of each parameter and numerical values used. (B) Relationship between NO and DETA NONOate (DETA) concentrations over a 10 min period. (C) The effect of the presence of lipids (40 mg/ml lipid micelles)[21] on NO concentration. The effect of 5%  $O_2$  on DETA derived NO concentrations in an aqueous environment (D) or in the presence of lipids (E). Inset highlights results under a physiological range of NO output within the healthy vasculature. (F) Effect of varying  $O_2$  levels on DETA-derived NO concentrations calculated using variables for aqueous and lipid environments.
